# Supplementary material for: Understanding the role of tampons at menarche: Qualitative research to inform the development of a tampon training workshop
Source: Research Square preprint supplement (doi:10.21203/rs.3.rs-8168014/v1), 2025-12-31
Supplement: Supplementary file 2 [file 74e19b07f806db068cf3c52b.pdf]

# TAMPON TOOLKIT DESIGN THINKING WORKSHOP

Roxborough High School

Page 1 of 4

Group  
1

Group  
2

Group  
3

Group  
4

## First Period Experiences & Perspectives

Who is this app for?

New athlete  
looking for a  
comfortable  
product

Planning  
for girls  
ages 9-14

Wants to  
use this app  
when she  
first gets her  
period

Learn early  
so they  
know what  
to expect

Age  
13

Age  
13

App is for  
young  
teens with  
abnormal  
cycles

Thoughts on first period

"Sharp pains,  
someone  
explained  
what it was.  
Put a pad on  
and cried."

"Why is  
my body  
doing  
that?"

Mom  
only  
provided  
pads

"Thought  
I was  
broken"

Girls don't  
know enough  
about  
becoming a  
woman

Had heard  
it was  
painful  
(cramping)

Wished there  
was a guide  
about why we  
get a period  
and why it's  
painful

Learning  
about  
tampons and  
periods helped  
her feel more  
in control

Helped to  
know  
what's  
going on

Predicting  
next cycle  
is hard

Info sources

Mom  
helped out  
after first  
period  
came

Asked mom,  
google, and  
YouTube to  
learn what was  
happening

Asked  
mom  
first

Only so  
much info  
can get  
from mom

Best to start  
learning  
before  
period from  
mom

Helpful  
to have  
parents  
explain it

Generally  
afraid to  
ask family  
members

Got more  
information  
from other  
family  
members

Only  
shared  
with  
mom

Tampon impressions

Imagines  
tampons to  
be  
uncomforta  
ble

Didn't  
know how  
to use a  
tampon the  
first time

Tried to use  
tampons  
for sports,  
tried alone  
at first

Wish the  
box was  
more  
detailed

Didn't  
know what  
tampons  
were

Sometimes  
bad first  
experience  
with  
tampon

Scared to  
use  
tampons,  
assumed  
them unsafe

Had never  
used tampons,  
needed  
tampons for  
sports

"If you don't  
know how to  
use a tampon,  
then don't use  
one"

"Should I  
lose my  
virginity  
for it?"

People have  
heard about  
dangers of  
tampons, not  
as much  
positive

Biggest  
problem is  
figuring out  
when to  
change  
tampon

Dislikes the  
discomfort  
with using  
tampons

# TAMPON TOOLKIT DESIGN THINKING WORKSHOP

Roxborough High School |

Page 2 of 4

Group  
1

Group  
2

Group  
3

Group  
4

## App Features

Period tracker

Calendar to predict when period will come

Reminders for when period is coming

Keep track of when period will come if it's regular

Need period tracking

Want to see period tracking on a calendar

Predict when your next cycle will start

Predict how heavy your cycle will be on certain days

User inputs the days that cycle is heavy/light to help predict

Capture age, cycle length, start date, then show a clock/calendar to track

Calendar tracks cycle

Want a predictor for period coming

Notifications for period coming

Tampon timer

Want timer on when to change tampon

Send reminders leading up to time to take it out

Send notification when time to take it out

Timer in app for keeping tampon in

Start timer in app when put tampon in

Keep track of when to change a tampon

Clock/timer shows how long tampon has been in

Set reminders to change tampons

Ask questions when you stop tampon timer (full, any activity, etc.) to predict

Notifications for tampon timer

Quizzes / gamification

Want something like Trivia Crack with animated pad vs. tampon fight with statistics

Game practicing putting tampons in and a quiz

Want equation (quiz?) to see what you should be using that day

A quiz for should you wear a tampon or pad (what are you doing today, what time is it, how heavy?)

App suggests tampons or pads based on activities and flow

Want quizzes with different screens if they answer yes or no

Live chat support

Live support 24/7 for her questions

Need 24/7 "ask me" support

Live chat with doctors

Talk to doctor without the doctor knowing who it is

Anonymous chat with professional

Wants someone to ask questions to

Social

Want live polls by users

Post/share/read stories about first period

Chat with people your age

Need comments

Need opinion availability

Other

If leave home and on period, app reminds you to take stuff

Need searches

# TAMPON TOOLKIT DESIGN THINKING WORKSHOP

Roxborough High School |

Page 3 of 4

Group  
1

Group  
2

Group  
3

Group  
4

## App Content

Tampon-specific

Discover the best way to feel comfortable using a tampon

Need info on the side effects and tell girls don't be afraid

Provide recommended brands or types of tampons

Do not need to include store locations to buy tampons, but maybe what type of stores sell them

Need general information like when to use tampons

Want to know how long you should wear a tampon

Wants to know what things to be careful about

Need info on pros and cons of tampons

A pro is less worry about overflow vs pads

App should tell you to have products on you no matter what

Advice on what to do if you have no pads or tampons

Need info related to TSS

Is wearing them at night ok?

Needs helping tips

Let people know it hurts the first few times

Include daily tips at the bottom

Need to help girls feel more comfortable with the idea of tampons

"Change more often with exercise"

Step by step diagram for how to use a tampon

Facts & statistics

Need tampon facts

Need TSS statistics and facts

Include statistics on periods and tampons

Include stats

Personalization

Want to read opinions on tampons and pads

Need different info for athletes vs regular girls

Planning to give different "chunks" of information based on age

Want personalized guide to periods and tampons

Want to know the right medicine or helpful things for cramps

Need recommendation on tampon sizes

Ask if they are usually above to give more personalized info

General period info

Show info about what's normal to reassure people

Need to know that period not be irregular at first (how long?)

Wants general info

Need period facts

Need to know how long periods last

Answers to common questions about their period

Info on adjusting to having to keep track of period

Need info on good foods to eat while on period

Need info on when it starts - now what?

Need info on regular vs. irregular

Need info on how to get rid of bloodstains

Need info on mood changes

Need info on timing of period

Need info on different period symptoms and severity of symptoms and how to combat them

Need info on period syncing

How-to's for tampons

"Tampons are efficient, but I don't know if I'm using them right"

Need info on how to practice how to use it

Links to videos for how to use tampons

How to for practicing putting tampon in

How to practice putting tampons in

Need info on how to put tampons in (advice, maybe rough visual)

Myths & FAQs

Need truths and myths

Need a mythbusters section for tampons

FAQ section

Need questions and answers

Include FAQs

Do's and don'ts

Want do's and don'ts

Want to know what to do / not do regarding periods

Do's and don'ts (things to be careful about, what you shouldn't eat, etc.)

A list of do's and don'ts for during your period

Tampons vs. pads

"Why is it better than a pad?"

Need to answer "why use it?"

Want to know the right time for tampons vs. pads

Wants advice on when to use tampon and pad

Pros of tampons over pads

Website vs. app

Consider website instead because people may not think of finding app to get this info

Website should hold the information

Use website for information and tips

Include testimonials on website



# TAMPON TOOLKIT DESIGN THINKING WORKSHOP

Roxborough High School |

Page 4 of 4

Group 1

Group 2

Group 3

Group 4

Other  
Considerations

|                         |                                                                                       |                                                                 |                                                                                        |                                                  |                                                        |                           |                                                         |                                             |                                          |
|-------------------------|---------------------------------------------------------------------------------------|-----------------------------------------------------------------|----------------------------------------------------------------------------------------|--------------------------------------------------|--------------------------------------------------------|---------------------------|---------------------------------------------------------|---------------------------------------------|------------------------------------------|
| Privacy                 | Good because can learn in private                                                     | Want a generic name and picture so people don't know what it is | Nervous about others seeing it on your phone                                           | Password to get into the app                     | Need privacy, can't be obvious that app is for periods | Should be discrete        | Want app to be graphically unnoticeable on phone screen |                                             |                                          |
| Design                  | Animated photos, not real photos                                                      | Want design to be clean, visual, easy to find everything        | Need nice themes                                                                       | No flower decorations!                           | Need color coding                                      | Need pictures and details | Need easy access                                        | Should not have difficulty finding anything | Want a customizable color scheme for app |
| Level of detail         | Answer targeted questions in short paragraphs so you don't have to search for answers | Don't overwhelm people with information (make website for that) | Should have minimal info in app for emergencies                                        | Important not to overwhelm them with information |                                                        |                           |                                                         |                                             |                                          |
| Tone                    | App should not focus on negative stuff, but still warn about dangers                  | Have fun section names                                          | Should not make user feel uncomfortable                                                |                                                  |                                                        |                           |                                                         |                                             |                                          |
| App name                | App name: Tampon Freedom                                                              | App name: Personal Calendar, abbreviate to PC for app icon      |                                                                                        |                                                  |                                                        |                           |                                                         |                                             |                                          |
| Performance & discovery | Should not have slow reaction times                                                   | App is there when they need it                                  | Include lots of commonly searched keywords so website comes up early in search results | Need ratings                                     |                                                        |                           |                                                         |                                             |                                          |
